# Supplementary material for: DeepCOVID-Fuse: A Multi-Modality Deep Learning Model Fusing Chest X-rays and Clinical Variables to Predict COVID-19 Risk Levels
Source: MDPI journal article supplement (doi:10.3390/bioengineering10050556), 2023-05-05
Supplement: s1 [file s1]

# DeepCOVID-Fuse: A Multi-Modality Deep Learning Model Fusing Chest X-Radiographs and Clinical Variables to Predict COVID-19 Risk Levels

Yunan Wu <sup>1,\*</sup>, Amil Dravid <sup>2</sup>, Ramsey Michael Wehbe <sup>3</sup> and Aggelos K. Katsaggelos <sup>1,2</sup>

<sup>1</sup> Department of Electrical and Computer Engineering, Northwestern University, Evanston, IL 60201, USA; aggk@eecs.northwestern.edu

<sup>2</sup> Department of Computer Science, Northwestern University, Evanston, IL 60201, USA; amildravid2023@u.northwestern.edu

<sup>3</sup> The Division of Cardiology, Department of Medicine and Bluhm Cardiovascular Institute, Northwestern Memorial Hospital, Chicago, IL 60611, USA; ramsey.wehbe@northwestern.edu

\* Correspondence: yunanwu2020@u.northwestern.edu

## 1. DeepCOVID-Fuse

The architecture of the ensemble fusion model is shown in Figure 1. The ensemble was chosen because studies have shown that the ensemble architecture is able to improve model performance and generalization ability [4]. Different combinations of feature dimensions from the image branch and the clinical variable branch when concatenated were compared. The feature dimension of the clinical variable branch after a fully connected layer was fixed at 128 while the feature dimension of the image branch varied, including 64 (smaller than clinical features), 128 (equal to clinical features), and the same dimension after each model's average pooling layer (larger than clinical features).

## 2. Image-Only Model and Feature-Only Model

The image-only model was trained and tested only on CXRs images, which used the image branch of the fusion model. As shown in Figure 1, after the dropout layer of the image branch, the features were fed into the dense layer without the concatenation layer. Similarly, the feature-only model trained and tested only on clinical variables, which used the clinical branch of the fusion model, i.e., after the dropout layer of the clinical branch, the features were fed into the dense layer without the concatenation layer.

## 3. Fusion-Image-Only and Fusion-Feature-Only Model

The Fusion-image-only model used the well-trained DeepCOVID-Fuse model (i.e., the trained weights), but only used CXRs as input for testing. Although no clinical variables were used, the fusion model required them as input, so we computed the average clinical features from the training set and used them as input to the test set, which means all test sets had the same clinical features calculated from the training set.

The Fusion-feature-only model used the same well-trained DeepCOVID-Fuse model but only used clinical features as input for testing. The fusion model still required a CXR input, so we chose a CXR image from the training set that had the most equal probability for the three classes predicted by the model. In other words, we did not want the images to add any bias to the fusion model predicted from clinical features alone.

## 3. Model Implement Details

Each individual architecture first initialized the weights from [4] (GitHub: [the link for the weights]). The convolutional layers were frozen, and the model was trained to fine-tune all fully connected layers and the clinical variable branch. Then, all layers were unfrozen and trained again on the training set. We used stochastic gradient descent as the

optimizer with initial learning of 0.0002 and momentum of 0.9. The batch size was set as 16 and early stopping with patience of 8 was used to avoid overfitting. The loss function was the class-weighted categorical cross-entropy loss, which was defined as:

$$L = \sum_i -\alpha_i y_i \log(p_i) \quad (S1)$$

Where  $y_i$  is the ground truth class of each subject  $i$ ,  $p_i$  is the predicted probabilities from the model, and  $\alpha_i$  is the class weight, which is calculated by inverting the frequency of each class to alleviate the class imbalance problem. Our code is publicly available on GitHub at <https://github.com/YunanWu2168/DeepCOVID-Fuse>.

**Table S1.** Patient characteristics from the training, validation, and test set.

| Clinical Variables        | Training       | Validation     | Test           |
|---------------------------|----------------|----------------|----------------|
| Total (n)                 | 1657           | 428            | 439            |
| Gender (M/F)              | 850/807        | 238/190        | 234/205        |
| Age (mean ± std)          | 58.30 ± 17.74  | 56.41 ± 17.03  | 56.51 ± 17.78  |
| RACE (n)                  |                |                |                |
| Asia                      | 78             | 7              | 10             |
| Black or African American | 436            | 112            | 60             |
| White                     | 856            | 234            | 325            |
| Other                     | 234            | 64             | 32             |
| Unknown                   | 53             | 11             | 12             |
| ETHNIC (n)                |                |                |                |
| Hispanic or Latino        | 381            | 127            | 256            |
| Not Hispanic or Latino    | 1231           | 290            | 176            |
| Other                     | 45             | 11             | 7              |
| SMOKING STATUS (n)        |                |                |                |
| Never smoker              | 877            | 245            | 300            |
| Smoker                    | 586            | 137            | 120            |
| Unknown                   | 199            | 46             | 19             |
| Atrial Rate               | 91.27 ± 31.95  | 95.45 ± 37.95  | 98.01 ± 35.62  |
| ECG (mean ± std)          |                |                |                |
| P-R Interval              | 164.05 ± 26.45 | 155.22 ± 27.92 | 154.32 ± 27.90 |
| QRS Duration              | 91.58 ± 20.68  | 90.31 ± 19.11  | 88.48 ± 17.16  |
| QT                        | 376.35 ± 49.57 | 369.93 ± 50.00 | 359.22 ± 41.55 |

|                             |                |                |                |
|-----------------------------|----------------|----------------|----------------|
| QTC                         | 448.81 ± 35.93 | 444.39 ± 36.73 | 444.93 ± 30.49 |
| BP Diastolic                | 76.89 ± 14.85  | 75.75 ± 14.02  | 78.15 ± 14.12  |
| BP Systolic                 | 136.32 ± 22.60 | 134.83 ± 22.63 | 135.87 ± 22.47 |
| Pulse                       | 93.76 ± 18.93  | 96.30 ± 20.63  | 99.01 ± 18.45  |
| Respirations                | 20.99 ± 5.16   | 21.58 ± 5.24   | 23.40 ± 7.33   |
| SPO2                        | 95.11 ± 6.69   | 94.83 ± 5.09   | 92.45 ± 10.41  |
| Temperature                 | 99.15 ± 1.50   | 99.32 ± 1.48   | 99.96 ± 1.61   |
| Comorbidity (n)             |                |                |                |
| Asthma                      | 4              | 2              | 0              |
| COPD                        | 249            | 38             | 24             |
| Cancer                      | 72             | 8              | 21             |
| Cardiovascular              | 654            | 156            | 113            |
| Cerebrovascular disease     | 285            | 65             | 49             |
| Chronic pulmonary disease   | 543            | 131            | 96             |
| Congestive heart failure    | 378            | 78             | 41             |
| Dementia                    | 177            | 43             | 55             |
| Diabetes                    | 614            | 170            | 191            |
| HIV_AIDS                    | 39             | 27             | 4              |
| Hemiplegia or paraplegia    | 58             | 18             | 10             |
| Hypertension                | 1026           | 251            | 240            |
| Immunological               | 105            | 37             | 18             |
| Malignancy                  | 239            | 51             | 62             |
| Metastatic Solid Tumor      | 126            | 25             | 26             |
| Myocardial infarction       | 131            | 23             | 17             |
| Peptic ulcer disease        | 90             | 15             | 16             |
| Peripheral vascular disease | 228            | 44             | 40             |
| Renal disease               | 538            | 120            | 137            |
| Rheumatic disease           | 74             | 31             | 13             |
| liver disease               | 206            | 36             | 78             |

|                                              |                       |                       |                       |
|----------------------------------------------|-----------------------|-----------------------|-----------------------|
| LAB (mean $\pm$ std)                         |                       |                       |                       |
| A Eos percent                                | 0.84 $\pm$ 1.66       | 0.63 $\pm$ 1.33       | 0.68 $\pm$ 1.52       |
| Absolute basophils                           | 0.01 $\pm$ 0.03       | 0.01 $\pm$ 0.03       | 0.01 $\pm$ 0.03       |
| Absolute eosinophils                         | 0.05 $\pm$ 0.12       | 0.05 $\pm$ 0.12       | 0.07 $\pm$ 0.43       |
| Absolute immature granulocytes,<br>automated | 0.05 $\pm$ 0.10       | 0.04 $\pm$ 0.07       | 0.05 $\pm$ 0.09       |
| Absolute lymphocytes                         | 1.38 $\pm$ 2.53       | 1.35 $\pm$ 0.90       | 1.22 $\pm$ 0.79       |
| Absolute monocytes                           | 0.58 $\pm$ 0.83       | 0.52 $\pm$ 0.26       | 0.56 $\pm$ 0.33       |
| Absolute neutrophils                         | 5.41 $\pm$ 4.79       | 5.36 $\pm$ 3.34       | 5.98 $\pm$ 3.79       |
| Albumin                                      | 3.82 $\pm$ 0.52       | 3.77 $\pm$ 0.47       | 3.72 $\pm$ 0.42       |
| Alkaline phos                                | 79.84 $\pm$ 49.65     | 74.65 $\pm$ 41.12     | 85.26 $\pm$ 55.43     |
| ALT (SGPT)                                   | 39.80 59.28           | 43.36 $\pm$ 50.74     | 38.44 $\pm$ 35.16     |
| Anion gap                                    | 12.06 $\pm$ 3.47      | 11.86 $\pm$ 3.48      | 10.72 $\pm$ 3.19      |
| AST (SGOT)                                   | 48.17 $\pm$ 89.00     | 48.68 $\pm$ 47.42     | 43.26 $\pm$ 38.67     |
| Basophils                                    | 0.19 $\pm$ 0.41       | 0.18 $\pm$ 0.40       | 0.14 $\pm$ 0.35       |
| C-Reactive protein                           | 38.77 $\pm$ 60.38     | 29.75 $\pm$ 47.82     | 31.93 $\pm$ 51.42     |
| Calcium                                      | 8.91 $\pm$ 0.60       | 8.93 $\pm$ 0.75       | 8.90 $\pm$ 0.59       |
| Chloride                                     | 100.68 $\pm$ 5.04     | 101.07 $\pm$ 5.18     | 99.43 $\pm$ 5.38      |
| CO <sub>2</sub>                              | 23.80 $\pm$ 3.68      | 23.72 $\pm$ 3.65      | 24.83 $\pm$ 3.56      |
| Creatinine                                   | 1.38 $\pm$ 1.68       | 1.43 $\pm$ 1.42       | 1.23 $\pm$ 1.37       |
| D-dimer                                      | 1105.15 $\pm$ 3456.19 | 1199.95 $\pm$ 5898.18 | 1635.64 $\pm$ 6804.57 |
| Direct bilirubin                             | 0.21 $\pm$ 0.20       | 0.20 $\pm$ 0.28       | 0.20 $\pm$ 0.21       |
| Eosinophils                                  | 0.82 $\pm$ 1.57       | 0.77 $\pm$ 1.33       | 0.94 $\pm$ 1.66       |
| GFR (African American)                       | 70.13 $\pm$ 35.81     | 66.05 $\pm$ 30.42     | 55.31 $\pm$ 12.02     |
| GFR (others)                                 | 62.80 $\pm$ 28.63     | 58.85 $\pm$ 24.83     | 53.65 $\pm$ 13.33     |
| Glucose                                      | 143.93 $\pm$ 78.06    | 141.58 $\pm$ 70.19    | 155.08 $\pm$ 82.29    |
| Hematocrit                                   | 39.71 $\pm$ 5.58      | 39.53 $\pm$ 5.52      | 39.69 $\pm$ 5.57      |
| Hemoglobin                                   | 13.05 $\pm$ 2.04      | 13.00 $\pm$ 2.07      | 13.30 $\pm$ 2.08      |
| Immature granulocytes                        | 0.62 $\pm$ 0.99       | 0.50 $\pm$ 0.68       | 0.63 $\pm$ 0.64       |
| INR                                          | 1.26 $\pm$ 0.67       | 1.66 $\pm$ 1.84       | 1.25 $\pm$ 0.44       |

|                        |                 |                 |                 |
|------------------------|-----------------|-----------------|-----------------|
| LDH                    | 383.11 ± 418.68 | 343.41 ± 146.85 | 332.39 ± 168.69 |
| Lymphocytes            | 19.79 ± 11.10   | 20.34 ± 11.81   | 17.78 ± 10.07   |
| MCH                    | 28.98 ± 2.58    | 28.85 ± 2.37    | 29.39 ± 2.45    |
| MCHC                   | 32.80 ± 1.46    | 32.82 ± 1.54    | 33.44 ± 1.41    |
| MCV                    | 88.31 ± 6.41    | 87.93 ± 5.86    | 87.91 ± 6.49    |
| Monocytes              | 8.32 ± 4.21     | 7.70 ± 3.75     | 7.70 ± 3.81     |
| MPV                    | 10.38 ± 0.96    | 10.34 ± 0.90    | 10.32 ± 0.94    |
| Neutrophils            | 70.03 ± 13.62   | 70.46 ± 13.30   | 72.91 ± 12.32   |
| Platelet count         | 224.41 ± 87.40  | 233.81 ± 94.25  | 227.47 ± 95.41  |
| Potassium              | 4.03 ± 0.61     | 3.99 ± 0.56     | 3.81 ± 0.50     |
| Procalcitonin          | 0.73 ± 4.05     | 0.83 ± 5.65     | 0.81 ± 4.48     |
| Prothrombin time (PT)  | 14.53 ± 8.17    | 19.39 ± 21.93   | 14.09 ± 5.17    |
| RDW                    | 13.88 ± 1.99    | 13.84 ± 1.97    | 13.65 ± 1.80    |
| Red cell count         | 4.53 ± 0.74     | 4.52 ± 0.71     | 4.54 ± 0.72     |
| Sodium                 | 136.54 ± 4.20   | 136.66 ± 4.18   | 134.68 ± 4.53   |
| Total bilirubin        | 0.61 ± 0.44     | 0.55 ± 0.29     | 0.65 ± 0.63     |
| Total protein          | 7.12 ± 0.76     | 7.06 ± 0.71     | 7.29 ± 0.66     |
| Troponin-I             | 0.15 ± 1.04     | 0.03 ± 0.05     | 0.04 ± 0.12     |
| Urea Nitrogen          | 19.44 ± 15.77   | 20.99 ± 15.93   | 19.98 ± 20.35   |
| White blood cell count | 7.73 ± 11.04    | 7.33 ± 3.58     | 7.96 ± 5.15     |

**Table S2.** Performance of DeepCOVID-Fuse (Ensemble) for risk predictions in confirmed COVID-19 subjects on external test sets in different age groups.

| <b>Ensemble Results<br/>in Different Age<br/>Groups</b> | <b>20–40</b>      | <b>40–60</b>      | <b>60–80</b>      | <b>80–100</b>    | <b>All</b>              |
|---------------------------------------------------------|-------------------|-------------------|-------------------|------------------|-------------------------|
| Size                                                    | 80                | 186               | 119               | 54               | 439                     |
| Distribution                                            | L:32, IM:29, H:19 | L:52, IM:87, H:47 | L:14, IM:54, H:51 | L:3, IM:23, H:28 | L:101, IM:193,<br>H:145 |
| Accuracy                                                | 0.652             | 0.661             | 0.692             | 0.632            | 0.658                   |
| Recall                                                  | 0.650             | 0.662             | 0.689             | 0.627            | 0.660                   |
| Precision                                               | 0.688             | 0.677             | 0.699             | 0.618            | 0.689                   |
| F1                                                      | 0.642             | 0.660             | 0.863             | 0.620            | 0.660                   |

|     |       |       |       |       |       |
|-----|-------|-------|-------|-------|-------|
| MCC | 0.623 | 0.638 | 0.645 | 0.604 | 0.640 |
| AUC | 0.821 | 0.845 | 0.847 | 0.791 | 0.842 |

Note.—AUC = area under the receiver operating characteristic curve; L = low risk level; IM = intermediate risk level; H = high risk level.

**Table S3.** Performance of fusion-image-only models for risk prediction in confirmed COVID-19 subjects on external test sets using CXRs as model input with a random subset (%) of clinical variables (0: no clinical features, 100: full clinical features).

| COVID-Level<br>(Proportion of<br>Clinical<br>Features in<br>Fusion) | 0                       | 20%                     | 40%                     | 60%                     | 80%                     | 100%                    |
|---------------------------------------------------------------------|-------------------------|-------------------------|-------------------------|-------------------------|-------------------------|-------------------------|
| Accuracy                                                            | 0.623<br>[0.604, 0.641] | 0.625<br>[0.615, 0.635] | 0.630<br>[0.620, 0.640] | 0.635<br>[0.620, 0.650] | 0.645<br>[0.634, 0.656] | 0.658<br>[0.650–0.667]  |
| Recall                                                              | 0.620<br>[0.608, 0.632] | 0.623<br>[0.607, 0.638] | 0.628<br>[0.617, 0.639] | 0.634<br>[0.615, 0.653] | 0.647<br>[0.635, 0.657] | 0.657<br>[0.649–0.666]  |
| Precision                                                           | 0.639<br>[0.623, 0.647] | 0.637<br>[0.619, 0.655] | 0.640<br>[0.622, 0.658] | 0.647<br>[0.632, 0.662] | 0.656<br>[0.643, 0.669] | 0.671<br>[0.658, 0.684] |
| F1                                                                  | 0.627<br>[0.611, 0.639] | 0.627<br>[0.612, 0.642] | 0.630<br>[0.614, 0.645] | 0.634<br>[0.619, 0.649] | 0.644<br>[0.633, 0.656] | 0.658<br>[0.650, 0.666] |
| MCC                                                                 | 0.613<br>[0.605, 0.621] | 0.612<br>[0.601, 0.623] | 0.616<br>[0.607, 0.625] | 0.623<br>[0.614, 0.631] | 0.625<br>[0.618, 0.632] | 0.635<br>[0.629, 0.641] |
| AUC                                                                 | 0.797<br>[0.784, 0.806] | 0.798<br>[0.787, 0.809] | 0.804<br>[0.796, 0.812] | 0.808<br>[0.802, 0.814] | 0.816<br>[0.814, 0.818] | 0.824<br>[0.822, 0.826] |

Note.—Data in parentheses are 95% CIs from five repeated experimental runs. AUC = area under the receiver operating characteristic curve; fusion-image-only = well-trained fusion models but tested with CXRs only.

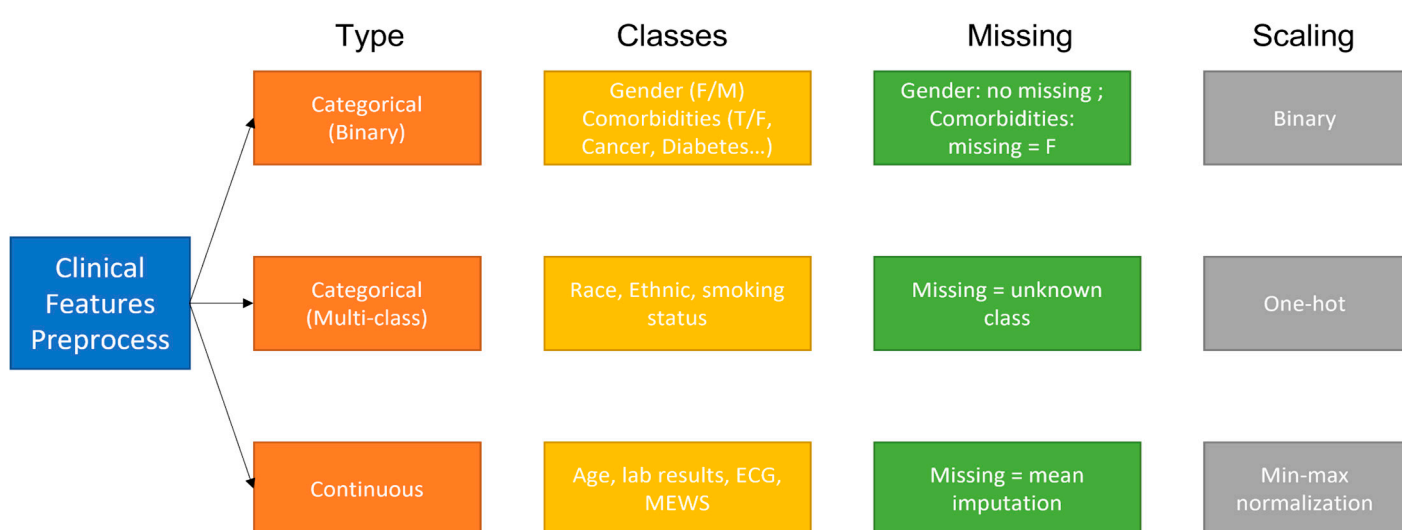

**Figure S1.** The preprocessing of clinical features. Features are classified into three types, binary, multi-class, and continuous with different missing imputation and scaling operations.
